# Supplementary material for: Does higher spatial resolution improve snow estimates?
Source: Copernicus journal article supplement (doi:10.5194/tc-2022-230), 2022-11-30
Supplement: Supplementary file [file tc-2022-230-AC2-supplement.pdf]

Dear Reviewer #2:

Thank you for reviewing our manuscript. I appreciate your time and critiques.

Your comments are in blue, our responses are in black, and text to be included in our revision is in red.

In this paper, the authors examine the value of two recently developed satellite fusion products, combined with reconstruction models to produce high spatial and temporal resolution SWE data. Snow covered area (SCA) data produced through the fusion of MODIS and Landsat or Sentinel and Landsat have the potential to provide high spatial and temporal resolution data that is not available through any single sensor. This study evaluates these products along with a baseline MODIS-derived SCA product to assess the effects of spatial and temporal resolution on SWE estimates. The results found that while the bias is lower for the high resolution products, the mean absolute error is higher which is different than previous studies which found better results with higher resolution data.

This work is relevant and timely to the snow community and to ongoing discussions about the measurement requirements of future satellite missions. It contributes to recent work on fusing various data products together for improved spatial and/or temporal resolution snow observations. The manuscript is well written, and I believe it will be ready for publication with minor revision. However, there are a few areas where I think the manuscript could be improved.

The authors stop short of answering the compelling question posed by the title, or even going into much discussion on it. The results seem to suggest the answer is no, but one of the primary conclusions is that we're headed that way (towards high resolution data) anyway. If that title is kept then I think the discussion needs to be greatly expanded to cover why these results may differ from previous studies.

Thank you for the suggestion. We have added the and editing the following in the Results and Discussion

In summary, the answer to the question posed by the title of this study is yes, as the bias—arguably the most important error statistic for water resource management—was 4-5% lower using the higher resolution snow cover forcings. However, the results are mixed relative to previous studies. For example, Durand et al. (2008) and Molotch and Margulis (2008) report both lower MAE and bias with a 30 m Landsat ETM+ snow cover forcing compared to snow cover from MODIS and AVHRR. The explanation for why some previous studies showed more significant improvements going from moderate to high resolution forcings may be the snow mapping algorithms used. An accurate technique for dealing with mixed pixels is particularly important for moderate resolution sensors since in for mid-latitude mountains most pixels are mixed at 500 m (Selkowitz et al., 2014). In Durand et al. (2008) and Molotch and Margulis (2008), the higher resolution Landsat ETM+ snow cover used a spectral unmixing technique (Painter et al., 2003), but the MODIS snow cover was based on the Normalized Snow Difference Technique, which only uses two bands, versus all available for spectral unmixing, and is shown to have higher MAE and bias (Stillinger et al., 2023). In Cline et al. (1998), the only other study

to specifically examine spatial scale with SWE reconstruction, a spectral mixture technique was used on 30 m Landsat ETM+ to produce snow cover estimates (Rosenthal and Dozier, 1996). In that study, the coarsened results produced basin-wide SWE above and below the control simulation used as validation, suggesting that coarsening components of the energy balance did not show a clear trend in error. The snow cover used in that study is shown to have low bias and other measures of error from [0-1] fsc (Rosenthal and Dozier, 1996), thus reducing errors from mixed pixels. Increased spatial and temporal resolution through sensor design, fusion techniques, and satellite constellations are the future of Earth observations, but this study shows how a moderate resolution sensor such as MODIS still offers value for snow mapping and modeling.

This manuscript could also help initiate a discussion on the value of high resolution data and what is required to outweigh the cost associated with increased data storage and processing time, particularly at a global scale. Based on the results of this analysis, is it worth it? If not, what improvement would be needed (i.e. error reduced by how much) to make it worth it? Alternatively, you could change the title to reflect the current content, e.g. analysis of recent snow cover data fusion products to drive SWE reconstruction models.

Questions of economic value, which is what I assume the Reviewer is referencing, are interesting and worthwhile, but beyond the scope of this study. One issue is that the costs and benefits are difficult to quantify. For example, the price of water in California fluctuates, based on who is purchasing it, how much they are purchasing. The economics of water is a well-studied field which would be suitable to answer these questions. Similarly, satellite missions greatly differ in cost. For example, strategies to lower costs such as building multiple instruments at one time can lower the cost significantly. Here we answer the question posed by the title with error metrics, and as the above paragraph shows, the answer is yes.

Additional comments:

Line 50-51: The sentence “When these artifacts were corrected, the SWE volumes at 90m were overestimates and underestimates at coarser resolutions” is worded awkwardly. Suggest rewording to make it clearer.

Changed to

When these artifacts were corrected, the SWE volumes at 90 m were overestimates while those at coarser resolutions were underestimates.

Line 51: “showed” instead of “show”

This is confusing. The word "shows" not "show" appears on l 51 and is used correctly. Present tense (show) is used correctly here as it is used widely in scientific writing when describing results. "Blöschl...shows..." NOT Blöschl...showed..."

Line 65: “false negatives” – if MODIS has less patchy snow, I assume that means it was mapping full coverage (overestimating)? Should that say “fewer false positives” instead of “false negatives”, like on line 248?

No, MODIS tends to miss snow and produce false negatives.

In Figure 6 of Rittger et al. (2013), relative to SCAG applied to ETM+, MODSCAG underestimates snow cover in the Himalaya and Upper Rio Grande, but slightly overestimates in the Sierra Nevada. For the two cases with underestimates, there are more pixels mapped as snow by ETM+, suggesting higher Recall ( $TP / (TP + FN)$ ) where TP is true positive and FN is false negative. In other words, the issue is that MODSCAG is showing no snow on patchy pixels mapped with snow by ETM+, meaning MODSCAG has a higher proportion of false negatives than SCAG applied to ETM+. This makes intuitive sense as there's a lower limit to fsca detection. For example, say an isolated 10% snow covered pixel at 30 m with no other snow covered neighbors can be correctly mapped as snow by ETM+ whereas that pixel will be mapped as no snow when the same algorithm is applied to MODIS.

Line 66-67: Did Winstral et al. find that 100m resolution was needed for the forcing data, or the model resolution?

They tested both. Changed to

Winstral et al. (2014) examined scale in a snow energy balance model at a range of spatial resolutions and find that 100 m spatial resolution is needed to accurately simulate snow melt.

Line 120: what is “CFmask”? Not defined in text

Changed to

Standard cloud masks (Foga et al., 2017) were used to select the 100 most cloud free Level 2 surface reflectance images (USGS, 2021) for dates spanning Mar 2013 to Mar 2021 (**Error! Reference source not found.**).

Lines 154-169: This section is difficult to follow. It sounds like you're using a domain average peak SWE and date to correct GLDAS. Why not correct it by pixel? A graph showing the basin-average SWE with the original GLDAS, ParBal, Hybrid SWE and ASO might help demonstrate the process.

Agree. Equation 1 has been revised to include time period subscripts. The correction is done by pixel. Sometimes there are multiple GLDAS pixels with matching snow duration to our remotely-sensed retrievals. In that case, an average between the GLDAS pixels is used.

Changed to

The concept is to identify GLDAS pixels with similar snow cover duration as the fine-scale fsca pixels, find the peak SWE day from those GLDAS pixels, then scale the GLDAS estimates by the ParBal SWE estimate on that peak day. This process is repeated for every fine-scale pixel.

Thank you for the suggestion to add a figure. We've added a figure showing the SWE for an individual pixel.

Figure 1 shows this hybrid GLDAS and reconstructed SWE for an example pixel in WY 2019. ParBal was run with each of the snow cover forcings, holding all other inputs constant.

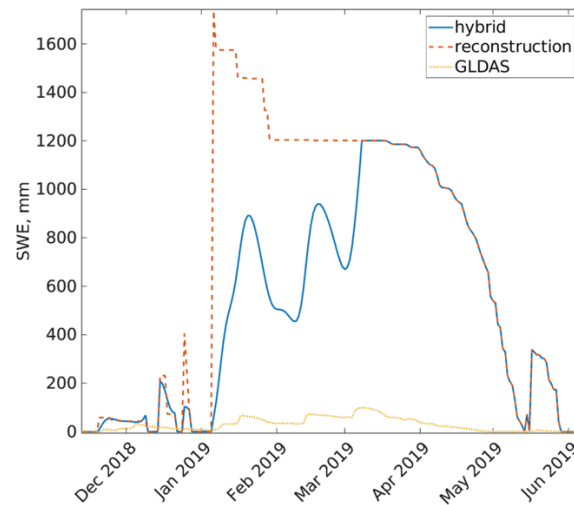

Figure 1:  
*Hybrid SWE estimates for the accumulation season combining reconstruction and GLDAS for an example pixel using the SPIReS-HLS snow cover.*

Line 232: The limitations of downscaling coarse resolution forcing data deserve more discussion, and additional references of more recent work (e.g. Pflug et al, 2021). “CERES” is mentioned for the first time here and not defined. While ParBal has been extensively covered in other papers, it seems worth describing the reanalysis datasets and downscaling techniques used in this study to better understand how that might impact the MAE.

Thank you for this reference. This section has been revised and now includes a semivariogram analysis per Reviewer #1's recommendation.

Another explanation for the poorer MAE performance from SPIReS-MODIS is that some spatial variation in topography is lost with the coarser resolution. To test this hypothesis, a semi-variogram of the terrain slope is examined, as in Baba et al. (2019). The semi-variogram shows a flattening around 500 m, indicating that variation in topography, which can manifest in topographically-driven variables such as direct solar illumination, is poorly captured at MODIS and coarser spatial scales. This semi-variogram analysis confirms the above hypothesis. Further, downscaling coarse scale reanalysis products (Winstral et al., 2014) e.g., the downwelling radiation from Clouds and Earth's Radiant Energy System (Rutan et al., 2015) at 1° spatial resolution, has inherent limitations, often due to clouds (Lapo et al., 2017). Important to note is that ParBal does use precipitation as a forcing and thus does not suffer from well-known biases and downscaling issues (Raleigh et al., 2015; Pflug et al., 2021).

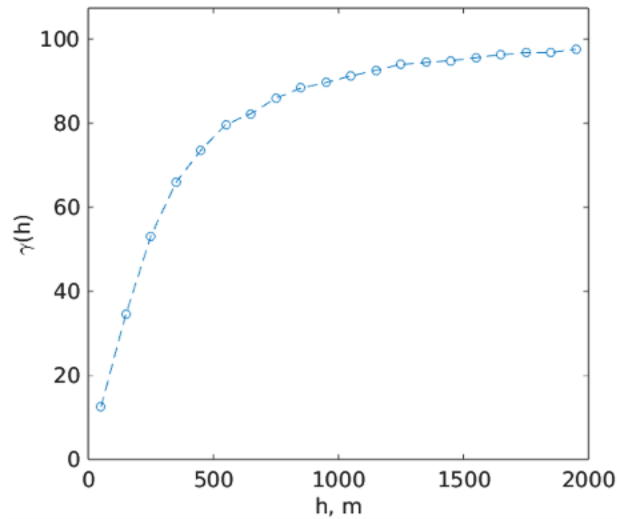

**Figure 2:**  
*Semi-variance of terrain slope of the Tuolumne River Basin above Hetch Hetchy. The slope of the semivariance (not the terrain slope itself) shows a flattening around 500 m, or about the MODIS pixel size.*

Lines 293 – 308, Conclusion: You state that the results differ from previous work, without going into a lot of detail. Specifically, how do the percent errors reported in Molotch and Margulis (2008) compare to the results of this study? They found almost the opposite MAE results using high-res and moderate-res data (lines 61-62). I think it would strengthen the paper to add more discussion on what is causing the differences in results.

We attribute it to a lack of spectral mixture analysis used for the MODIS snow retrievals. Please see the added text at the end of the Results and Discussion section referenced.

#### References:

Pflug, J. M., Hughes, M., & Lundquist, J. D. (2021). Downscaling snow deposition using historic snow depth patterns: Diagnosing limitations from snowfall biases, winter snow losses, and interannual snow pattern repeatability. *Water Resources Research*, **57**, e2021WR029999. <https://doi.org/10.1029/2021WR029999>

Baba, M. W., Gascoin, S., Kinnard, C., Marchane, A., and Hanich, L.: Effect of digital elevation model resolution on the simulation of the snow cover evolution in the High Atlas, *Water Resources Research*, **55**, 5360-5378, 10.1029/2018WR023789, 2019.

Cline, D., Elder, K., and Bales, R.: Scale effects in a distributed snow water equivalence and snowmelt model for mountain basins, *Hydrological Processes*, **12**, 1527-1536, 10.1002/(SICI)1099-1085(199808/09)12:10/11<1527::AID-HYP678>3.0.CO;2-E, 1998.

- Durand, M., Molotch, N. P., and Margulis, S. A.: Merging complementary remote sensing datasets in the context of snow water equivalent reconstruction, *Remote Sens Environ*, 112, 1212-1225, 10.1016/j.rse.2007.08.010, 2008.
- Foga, S., Scaramuzza, P. L., Guo, S., Zhu, Z., Dilley, R. D., Beckmann, T., Schmidt, G. L., Dwyer, J. L., Joseph Hughes, M., and Laue, B.: Cloud detection algorithm comparison and validation for operational Landsat data products, *Remote Sens Environ*, 194, 379-390, 10.1016/j.rse.2017.03.026, 2017.
- Lapo, K. E., Hinkelman, L. M., Sumargo, E., Hughes, M., and Lundquist, J. D.: A critical evaluation of modeled solar irradiance over California for hydrologic and land surface modeling, *Journal of Geophysical Research: Atmospheres*, 122, 299-317, 10.1002/2016JD025527, 2017.
- Molotch, N. P., and Margulis, S. A.: Estimating the distribution of snow water equivalent using remotely sensed snow cover data and a spatially distributed snowmelt model: A multi-resolution, multi-sensor comparison, *Advances in Water Resources*, 31, 1503-1514, 10.1016/j.advwatres.2008.07.017, 2008.
- Painter, T. H., Dozier, J., Roberts, D. A., Davis, R. E., and Green, R. O.: Retrieval of subpixel snow-covered area and grain size from imaging spectrometer data, *Remote Sens Environ*, 85, 64-77, 10.1016/S0034-4257(02)00187-6, 2003.
- Pflug, J. M., Hughes, M., and Lundquist, J. D.: Downscaling snow deposition using historic snow depth patterns: diagnosing limitations from snowfall biases, winter snow losses, and interannual snow pattern repeatability, *Water Resources Research*, 57, e2021WR029999, 10.1029/2021WR029999, 2021.
- Raleigh, M. S., Lundquist, J. D., and Clark, M. P.: Exploring the impact of forcing error characteristics on physically based snow simulations within a global sensitivity analysis framework, *Hydrol. Earth Syst. Sci.*, 19, 3153-3179, 10.5194/hess-19-3153-2015, 2015.
- Rittger, K., Painter, T. H., and Dozier, J.: Assessment of methods for mapping snow cover from MODIS, *Advances in Water Resources*, 51, 367-380, 10.1016/j.advwatres.2012.03.002, 2013.
- Rosenthal, W., and Dozier, J.: Automated mapping of montane snow cover at subpixel resolution from the Landsat Thematic Mapper, *Water Resources Research*, 32, 115-130, 10.1029/95WR02718, 1996.
- Rutan, D. A., Kato, S., Doelling, D. R., Rose, F. G., Nguyen, L. T., Caldwell, T. E., and Loeb, N. G.: CERES synoptic product: Methodology and validation of surface radiant flux, *Journal of Atmospheric and Oceanic Technology*, 32, 1121-1143, 10.1175/JTECH-D-14-00165.1, 2015.

- Selkowitz, D. J., Forster, R. R., and Caldwell, M. K.: Prevalence of pure versus mixed snow cover pixels across spatial resolutions in alpine environments, *Remote Sensing*, 6, 12478-12508, 10.3390/rs61212478, 2014.
- Stillinger, T., Rittger, K., Raleigh, M. S., Michell, A., Davis, R. E., and Bair, E. H.: Landsat, MODIS, and VIIRS snow cover mapping algorithm performance as validated by airborne lidar datasets, *The Cryosphere*, 17, 567-590, 10.5194/tc-17-567-2023, 2023.
- Winstral, A., Marks, D., and Gurney, R.: Assessing the sensitivities of a distributed snow model to forcing data resolution, *Journal of Hydrometeorology*, 15, 1366-1383, 10.1175/jhm-d-13-0169.1, 2014.
